# Supplementary material for: Sex-dependent regulation of retinal pigment epithelium and retinal function by Pgc-1α
Source: Front Cell Neurosci. 2024 Sep 2;18:1442079. doi: 10.3389/fncel.2024.1442079 (PMC11403373; doi:10.3389/fncel.2024.1442079)
Supplement: Supplementary Table 1 — Primer sequences used in qPCR experiments. [file Table_1.xlsx]

## Sheet: Primer Sequences
Mouse Gene Name	Forward Primer Sequence (5’-3’)	Reverse Primer Seq (5’-3’)
Sod1	ATGGCGATGAAAGCGGTGT	CCTTGTGTATTGTCCCCATACTG
Sod2	CACCGAGGAGAAGTACCACG	CTCCAGCAACTCTCCTTTGGG
Catalase	TCACTGACGAGATGGCACAC	GAGCCTGACTCTCCAGTGAC
Prdx5	ACCTGGCTGTTCTAAGACCCA	CCGACGATTCCCAAAGAGAGA
Gpx1	AATGTCGCGTCTCTCTGAGG	TCCGAACTGATTGCACGGG
Opa1	ACCAGGAGAAGTAGACTGTGTCAA	TCTTCAAATAAACGCAGAGGTG
Mff	AGCTGCCGCCACTTCTAATC	TGCATCTACCACAGTCATGTCA
Drp1	AGATCGTCGTAGTGGGAACG	CCACTAGGCTTTCCAGCACT
Mfn2	CCAACTCCAAGTGTCCGCTC	GTCCAGCTCCGTGGTAACATC
Gapdh	AAGGTCGGTGTGAACGGATT	AATCTCCACTTTGCCACTGC
Esrra	GGGGAGCATCGAGTACAGC	AGACGCACACCCTCCTTGA
Nfe2l2	TCACACGAGATGAGCTTAGGGCAA	TACAGTTCTGGGCGGCGACTTTAT
Esr1	ATTCTGACAATCGACGCCAG	GTGCTTCAACATTCTCCCTCCTC
