# Supplementary material for: Sex-dependent regulation of retinal pigment epithelium and retinal function by Pgc-1α
Source: Front Cell Neurosci. 2024 Sep 2;18:1442079. doi: 10.3389/fncel.2024.1442079 (PMC11403373; doi:10.3389/fncel.2024.1442079)
Supplement: Supplementary Table 2 — ANOVA tables for Figure 1. [file Table_2.xlsx]

## Sheet: Sheet1
Supplementary Figure 1. ANOVA Tables for Figure 1
	ANOVA Omnibus Test and Pairwise Comparisons for c-wave ERG
	Three-way ANOVA	c-wave ERG Amplitudes			c-wave implicit time
	Factors	P value	P value	F (DFn, DFd)	P value	P value	F (DFn, DFd)
	Age	P<0.0001	****	F (1, 116) = 32.43	P<0.0001	****	F (1, 116) = 17.68
	Genotype	P<0.0001	****	F (1, 116) = 31.16	P=0.0016	**	F (1, 116) = 10.40
	Sex	P=0.0014	**	F (1, 116) = 10.71	P<0.0001	****	F (1, 116) = 23.77
	Age x Genotype	P=0.1255	ns	F (1, 116) = 2.381	P=0.5832	ns	F (1, 116) = 0.3027
	Age x Sex	P=0.0044	**	F (1, 116) = 8.423	P=0.0340	*	F (1, 116) = 4.602
	Genotype x Sex	P=0.6706	ns	F (1, 116) = 0.1818	P=0.1903	ns	F (1, 116) = 1.736
	Age x Genotype x Sex	P=0.5097	ns	F (1, 116) = 0.4373	P=0.7770	ns	F (1, 116) = 0.08059
	C-wave amplitudes						C-wave amplitudes
	Holm-Šídák's multiple comparisons test	Summary	Adjusted P Value	N1	N2		ANOVA table	SS (Type III)	DF	MS	F (DFn, DFd)	P value	P value
							Age	0.2004	1	0.2004	F (1, 116) = 32.43	P<0.0001	****
	3mo:Male WT vs. 8mo:Male WT	ns	0.7137	17	14		Genotype	0.1925	1	0.1925	F (1, 116) = 31.16	P<0.0001	****
	3mo:Female WT vs. 8mo:Female WT	*	0.0141	17	14		Sex	0.06619	1	0.06619	F (1, 116) = 10.71	P=0.0014	**
	3mo:Male Pgc-1α+/- vs. 8mo:Male Pgc-1α+/-	ns	0.2942	15	16		Age x Genotype	0.01471	1	0.01471	F (1, 116) = 2.381	P=0.1255	ns
	3mo:Female Pgc-1α+/- vs. 8mo:Female Pgc-1α+/-	****	<0.0001	13	18		Age x Sex	0.05204	1	0.05204	F (1, 116) = 8.423	P=0.0044	**
	3mo:Male WT vs. 3mo:Female WT	ns	0.7137	17	17		Genotype x Sex	0.001123	1	0.001123	F (1, 116) = 0.1818	P=0.6706	ns
	3mo:Male Pgc-1α+/- vs. 3mo:Female Pgc-1α+/-	ns	0.7331	15	13		Age x Genotype x Sex	0.002702	1	0.002702	F (1, 116) = 0.4373	P=0.5097	ns
	8mo:Male WT vs. 8mo:Female WT	*	0.0368	14	14		Residual	0.7168	116	0.006179
	8mo:Male Pgc-1α+/- vs. 8mo:Female Pgc-1α+/-	**	0.0092	16	18
	3mo:Male WT vs. 3mo:Male Pgc-1α+/-	ns	0.0592	17	15
	3mo:Female WT vs. 3mo:Female Pgc-1α+/-	ns	0.4795	17	13
	8mo:Male WT vs. 8mo:Male Pgc-1α+/-	**	0.0092	14	16
	8mo:Female WT vs. 8mo:Female Pgc-1α+/-	**	0.0033	14	18
	C-wave implicit time						C-wave implicit times
	Holm-Šídák's multiple comparisons test	Summary	Adjusted P Value	N1	N2		ANOVA table	SS (Type III)	DF	MS	F (DFn, DFd)	P value	P value
							Age	616001	1	616001	F (1, 116) = 17.68	P<0.0001	****
	3mo:Male WT vs. 8mo:Male WT	ns	0.9031	17	14		Genotype	362158	1	362158	F (1, 116) = 10.40	P=0.0016	**
	3mo:Female WT vs. 8mo:Female WT	*	0.0284	17	14		Sex	827937	1	827937	F (1, 116) = 23.77	P<0.0001	****
	3mo:Male Pgc-1α+/- vs. 8mo:Male Pgc-1α+/-	ns	0.5522	15	16		Age x Genotype	10546	1	10546	F (1, 116) = 0.3027	P=0.5832	ns
	3mo:Female Pgc-1α+/- vs. 8mo:Female Pgc-1α+/-	*	0.0148	13	18		Age x Sex	160301	1	160301	F (1, 116) = 4.602	P=0.0340	*
	3mo:Male WT vs. 3mo:Female WT	ns	0.9031	17	17		Genotype x Sex	60454	1	60454	F (1, 116) = 1.736	P=0.1903	ns
	3mo:Male Pgc-1α+/- vs. 3mo:Female Pgc-1α+/-	ns	0.2388	15	13		Age x Genotype x Sex	2807	1	2807	F (1, 116) = 0.08059	P=0.7770	ns
	8mo:Male WT vs. 8mo:Female WT	*	0.0441	14	14		Residual	4040651	116	34833
	8mo:Male Pgc-1α+/- vs. 8mo:Female Pgc-1α+/-	***	0.0006	16	18
	3mo:Male WT vs. 3mo:Male Pgc-1α+/-	ns	0.9031	17	15
	3mo:Female WT vs. 3mo:Female Pgc-1α+/-	ns	0.2388	17	13
	8mo:Male WT vs. 8mo:Male Pgc-1α+/-	ns	0.5522	14	16
	8mo:Female WT vs. 8mo:Female Pgc-1α+/-	ns	0.1233	14	18
