# Supplementary material for: Sex-dependent regulation of retinal pigment epithelium and retinal function by Pgc-1α
Source: Front Cell Neurosci. 2024 Sep 2;18:1442079. doi: 10.3389/fncel.2024.1442079 (PMC11403373; doi:10.3389/fncel.2024.1442079)
Supplement: Supplementary Table 3 — ANOVA tables for Figure 2. [file Table_3.xlsx]

## Sheet: Sheet1
	Supplementary Figure 2. ANOVA Tables for Figure 2
	Figure 2A
	Two-way Repeated Measures ANOVA for a-waves								a-waves
	ANOVA table	SS	DF	MS	F (DFn, DFd)	P value	P value		Holm-Šídák's multiple comparisons test		Summary	Adjusted P Value	N1	N2
	Luminance x Sex	1204	6	200.7	F (6, 198) = 0.2972	P=0.9377	ns
	Luminance	2792315	6	465386	F (6, 198) = 689.0	P<0.0001	****		3mo Male WT - 3mo Female WT
	Sex	453.7	1	453.7	F (1, 33) = 0.05347	P=0.8186	ns		0.001		ns	>0.9999	15	20
	Subject	280025	33	8486	F (33, 198) = 12.56	P<0.0001	****		0.01		ns	0.9998	15	20
	Residual	133732	198	675.4					0.1		ns	>0.9999	15	20
									1		ns	0.976	15	20
									2		ns	0.9993	15	20
									5		ns	0.9994	15	20
									10		ns	>0.9999	15	20
	For Figure 2A
	Two-way Repeated Measures ANOVA for b-waves								b-waves
	ANOVA table	SS	DF	MS	F (DFn, DFd)	P value	P value		Holm-Šídák's multiple comparisons test		Summary	Adjusted P Value	N1	N2
	Luminance x Sex	3911	6	651.8	F (6, 198) = 0.1587	P=0.9871	ns
	Luminance	5821483	6	970247	F (6, 198) = 236.2	P<0.0001	****		3mo Male WT - 3mo Female WT
	Sex	9990	1	9990	F (1, 33) = 0.07374	P=0.7877	ns		0.001		ns	q	15	20
	Subject	4470498	33	135470	F (33, 198) = 32.98	P<0.0001	****		0.01		ns	0.9997	15	20
	Residual	813310	198	4108					0.1		ns	0.9997	15	20
									1		ns	0.9997	15	20
									2		ns	0.9997	15	20
									5		ns	0.9997	15	20
									10		ns	0.9997	15	20
	Figure 2C
	Two-way Repeated Measures ANOVA for a-waves								a-waves
	ANOVA table	SS	DF	MS	F (DFn, DFd)	P value	P value		Holm-Šídák's multiple comparisons test		Summary	Adjusted P Value	N1	N2
	Luminance x Sex	2939	6	489.9	F (6, 138) = 0.9476	P=0.4633	ns
	Luminance	1858920	6	309820	F (6, 138) = 599.3	P<0.0001	****		8mo Male WT - 8mo Female WT
	Sex	2629	1	2629	F (1, 23) = 0.3736	P=0.5471	ns		0.001		ns	0.9929	12	13
	Animal	161826	23	7036	F (23, 138) = 13.61	P<0.0001	****		0.01		ns	0.969	12	13
	Residual	71340	138	517					0.1		ns	0.9734	12	13
									1		ns	0.9929	12	13
									2		ns	0.9929	12	13
									5		ns	0.9231	12	13
									10		ns	0.6761	12	13
	For Figure 2C
	Two-way Repeated Measures ANOVA for b-waves								b-waves
	ANOVA table	SS	DF	MS	F (DFn, DFd)	P value	P value		Holm-Šídák's multiple comparisons test		Summary	Adjusted P Value	N1	N2
	Luminance x Sex	7218	6	1203	F (6, 138) = 0.6559	P=0.6853	ns
	Luminance	5621157	6	936859	F (6, 138) = 510.8	P<0.0001	****		8mo Male WT - 8mo Female WT
	Sex	11185	1	11185	F (1, 23) = 0.2548	P=0.6185	ns		0.001		ns	0.9974	12	13
	Animal	1009661	23	43898	F (23, 138) = 23.93	P<0.0001	****		0.01		ns	0.9752	12	13
	Residual	253115	138	1834					0.1		ns	0.9752	12	13
									1		ns	0.9974	12	13
									2		ns	0.9974	12	13
									5		ns	0.9752	12	13
									10		*	0.9277	12	13
	Figure 2E
	Two-way Repeated Measures ANOVA for a-waves								a-waves
	ANOVA table	SS	DF	MS	F (DFn, DFd)	P value	P value		Holm-Šídák's multiple comparisons test		Summary	Adjusted P Value	N1	N2
	Luminance x Sex	1417	6	236.1	F (6, 174) = 0.5112	P=0.7994	ns
	Luminance	2126979	6	354497	F (6, 174) = 767.5	P<0.0001	****		3mo Male Pgc-1α+/- - 3mo Female Pgc-1α+/-
	Sex	6916	1	6916	F (1, 29) = 1.535	P=0.2253	ns		0.001		ns	0.8222	17	14
	Subject	130682	29	4506	F (29, 174) = 9.757	P<0.0001	****		0.01		ns	0.8397	17	14
	Residual	80365	174	461.9					0.1		ns	0.6833	17	14
									1		ns	0.6833	17	14
									2		ns	0.8135	17	14
									5		ns	0.7414	17	14
									10		ns	0.6833	17	14
	For Figure 2E
	Two-way Repeated Measures ANOVA for b-waves								b-waves
	ANOVA table	SS	DF	MS	F (DFn, DFd)	P value	P value		Holm-Šídák's multiple comparisons test		Summary	Adjusted P Value	N1	N2
	Luminance x Sex	13446	6	2241	F (6, 174) = 0.5835	P=0.7432	ns
	Luminance	5558986	6	926498	F (6, 174) = 241.3	P<0.0001	****		3mo Male Pgc-1α+/- - 3mo Female Pgc-1α+/-
	Sex	141.1	1	141.1	F (1, 29) = 0.001406	P=0.9703	ns		0.001		ns	0.9997	17	14
	Subject	2909167	29	100316	F (29, 174) = 26.12	P<0.0001	****		0.01		ns	0.9958	17	14
	Residual	668224	174	3840					0.1		ns	0.9997	17	14
									1		ns	0.9997	17	14
									2		ns	0.9997	17	14
									5		ns	0.9964	17	14
									10		*	0.9997	17	14
	Figure 2G
	Two-way Repeated Measures ANOVA for a-waves								a-waves
	ANOVA table	SS	DF	MS	F (DFn, DFd)	P value	P value		Holm-Šídák's multiple comparisons test		Summary	Adjusted P Value	N1	N2
	Luminance x Sex	6771	6	1129	F (6, 156) = 2.280	P=0.0388	*
	Luminance	1643487	6	273915	F (6, 156) = 553.5	P<0.0001	****		8mo Male Pgc-1α+/- - 8mo Female Pgc-1α+/-
	Sex	20026	1	20026	F (1, 26) = 3.948	P=0.0576	ns		0.001		ns	0.9879	13	15
	Animal	131892	26	5073	F (26, 156) = 10.25	P<0.0001	****		0.01		ns	0.9294	13	15
	Residual	77204	156	494.9					0.1		ns	0.1638	13	15
									1		ns	0.2089	13	15
									2		ns	0.1334	13	15
									5		ns	0.1334	13	15
									10		ns	0.1334	13	15
	For Figure 2G
	Two-way Repeated Measures ANOVA for b-waves								b-waves
	ANOVA table	SS	DF	MS	F (DFn, DFd)	P value	P value		Holm-Šídák's multiple comparisons test		Summary	Adjusted P Value	N1	N2
	Luminance x Sex	25659	6	4276	F (6, 156) = 2.100	P=0.0562	ns
	Luminance	4359717	6	726620	F (6, 156) = 356.8	P<0.0001	****		8moMale Pgc-1α+/- - 8moFemale Pgc-1α+/-
	Sex	183262	1	183262	F (1, 26) = 4.800	P=0.0376	*		0.001		ns	0.7692	13	15
	Animal	992743	26	38182	F (26, 156) = 18.75	P<0.0001	****		0.01		ns	0.1579	13	15
	Residual	317672	156	2036					0.1		ns	0.1473	13	15
									1		ns	0.1473	13	15
									2		ns	0.1473	13	15
									5		ns	0.1473	13	15
									10		*	0.0461	13	15
	Figure 2I
	Two-way Repeated Measures ANOVA for a-waves								a-waves
	ANOVA table	SS	DF	MS	F (DFn, DFd)	P value	P value		Holm-Šídák's multiple comparisons test		Summary	Adjusted P Value	N1	N2
	Luminance x Genotype	1108	6	184.6	F (6, 138) = 0.3796	P=0.8910	ns
	Luminance	1720621	6	286770	F (6, 138) = 589.7	P<0.0001	****		8mo Male WT - 8mo Male Pgc-1α+/-
	Genotype	110.2	1	110.2	F (1, 23) = 0.02146	P=0.8848	ns		0.001		ns	0.9977	12	13
	Animal	118138	23	5136	F (23, 138) = 10.56	P<0.0001	****		0.01		ns	0.9973	12	13
	Residual	67111	138	486.3					0.1		ns	0.9973	12	13
									1		ns	0.9973	12	13
									2		ns	0.9977	12	13
									5		ns	0.9973	12	13
									10		ns	0.9917	12	13
	For Figure 2I
	Two-way Repeated Measures ANOVA for b-waves								b-waves
	ANOVA table	SS	DF	MS	F (DFn, DFd)	P value	P value		Holm-Šídák's multiple comparisons test		Summary	Adjusted P Value	N1	N2
	Luminance x Genotype	14202	6	2367	F (6, 138) = 1.552	P=0.1657	ns
	Luminance	4932820	6	822137	F (6, 138) = 539.2	P<0.0001	****		8mo Male WT - 8mo Male Pgc-1α+/-
	Genotype	22790	1	22790	F (1, 23) = 0.7320	P=0.4011	*		0.001		ns	0.9836	12	13
	Animal	716060	23	31133	F (23, 138) = 20.42	P<0.0001	****		0.01		ns	0.9836	12	13
	Residual	210400	138	1525					0.1		ns	0.9836	12	13
									1		ns	0.8477	12	13
									2		ns	0.8477	12	13
									5		ns	0.5248	12	13
									10		ns	0.7571	12	13
	Figure 2K
	Two-way Repeated Measures ANOVA for a-waves								a-waves
	ANOVA table	SS	DF	MS	F (DFn, DFd)	P value	P value		Holm-Šídák's multiple comparisons test		Summary	Adjusted P Value	N1	N2
	Luminance x Genotype	19984	6	3331	F (6, 156) = 6.380	P<0.0001	****
	Luminance	1786670	6	297778	F (6, 156) = 570.4	P<0.0001	****		8mo Female WT - 8mo Female Pgc-1α+/-
	Genotype	42753	1	42753	F (1, 26) = 6.331	P=0.0184	*		0.001		ns	0.7871	13	15
	Animal	175580	26	6753	F (26, 156) = 12.94	P<0.0001	****		0.01		ns	0.7674	13	15
	Residual	81433	156	522					0.1		ns	0.1418	13	15
									1		ns	0.1418	13	15
									2		ns	0.0793	13	15
									5		**	0.0068	13	15
									10		***	0.0002	13	15
	For Figure 2K
	Two-way Repeated Measures ANOVA for b-waves								b-waves
	ANOVA table	SS	DF	MS	F (DFn, DFd)	P value	P value		Holm-Šídák's multiple comparisons test		Summary	Adjusted P Value	N1	N2
	Luminance x Genotype	107711	6	17952	F (6, 156) = 7.771	P<0.0001	****
	Luminance	5038104	6	839684	F (6, 156) = 363.5	P<0.0001	****		8mo Female WT - 8mo Female Pgc-1α+/-
	Genotype	489024	1	489024	F (1, 26) = 9.884	P=0.0041	**		0.001		ns	0.9522	13	15
	Animal	1286344	26	49475	F (26, 156) = 21.42	P<0.0001	****		0.01		*	0.0491	13	15
	Residual	360387	156	2310					0.1		*	0.0184	13	15
									1		*	0.0184	13	15
									2		*	0.0184	13	15
									5		***	0.0009	13	15
									10		****	<0.0001	13	15
