# Supplementary material for: Sex-dependent regulation of retinal pigment epithelium and retinal function by Pgc-1α
Source: Front Cell Neurosci. 2024 Sep 2;18:1442079. doi: 10.3389/fncel.2024.1442079 (PMC11403373; doi:10.3389/fncel.2024.1442079)
Supplement: Supplementary Table 4 — ANOVA tables for Figure 3. [file Table_4.xlsx]

## Sheet: Sheet1
	Supplementary Figure 3. ANOVA Tables for Figure 3
	Figure 3A, Sod1 expression
	ANOVA table	SS (Type III)	DF	MS	F (DFn, DFd)	P value	P Value
	Interaction	0.1353	1	0.1353	F (1, 26) = 9.561	P=0.0047	**
	Genotype	0.06717	1	0.06717	F (1, 26) = 4.746	P=0.0386	*
	Sex	0.01892	1	0.01892	F (1, 26) = 1.337	P=0.2581	ns
	Residual	0.368	26	0.01415
	Holm-Šídák's multiple comparisons test	Summary	Adjusted P Value	N1	N2
	WT:Male vs. WT:Female	ns	0.3939	6	6
	Pgc-1α+/-:Male vs. Pgc-1α+/-:Female	**	0.0075	8	10
	WT:Male vs. Pgc-1α+/-:Male	**	0.0047	6	8
	WT:Female vs. Pgc-1α+/-:Female	ns	0.5145	6	10
	Figure 3B, Sod2 expression
	ANOVA table	SS (Type III)	DF	MS	F (DFn, DFd)	P value	P Value
	Interaction	0.05992	1	0.05992	F (1, 26) = 5.728	P=0.0242	*
	Genotype	0.01994	1	0.01994	F (1, 26) = 1.906	P=0.1792	ns
	Sex	0.05572	1	0.05572	F (1, 26) = 5.327	P=0.0292	*
	Residual	0.2719	26	0.01046
	Holm-Šídák's multiple comparisons test	Summary	Adjusted P Value	N1	N2
	WT:Male vs. WT:Female	ns	0.9564	6	6
	Pgc-1α+/-:Male vs. Pgc-1α+/-:Female	**	0.004	8	10
	WT:Male vs. Pgc-1α+/-:Male	*	0.0437	6	8
	WT:Female vs. Pgc-1α+/-:Female	ns	0.7194	6	10
	Figure 3C, Cat expression
	ANOVA table	SS (Type III)	DF	MS	F (DFn, DFd)	P value	P Value
	Interaction	0.2395	1	0.2395	F (1, 26) = 2.294	P=0.1419	ns
	Genotype	1.452	1	1.452	F (1, 26) = 13.91	P=0.0009	***
	Sex	0.02648	1	0.02648	F (1, 26) = 0.2537	P=0.6187	ns
	Residual	2.714	26	0.1044
	Holm-Šídák's multiple comparisons test	Summary	Adjusted P Value	N1	N2
	WT:Male vs. WT:Female	ns	0.3647	6	6
	Pgc-1α+/-:Male vs. Pgc-1α+/-:Female	ns	0.433	8	10
	WT:Male vs. Pgc-1α+/-:Male	ns	0.3585	6	8
	WT:Female vs. Pgc-1α+/-:Female	**	0.0032	6	10
	Figure 3D, Prdx5 expression
	ANOVA table	SS (Type III)	DF	MS	F (DFn, DFd)	P value	P Value
	Interaction	0.3692	1	0.3692	F (1, 26) = 2.981	P=0.0961	ns
	Genotype	2.651	1	2.651	F (1, 26) = 21.40	P<0.0001	****
	Sex	0.3013	1	0.3013	F (1, 26) = 2.433	P=0.1309	ns
	Residual	3.22	26	0.1239
	Holm-Šídák's multiple comparisons test	Summary	Adjusted P Value	N1	N2
	WT:Male vs. WT:Female	ns	0.9149	6	6
	Pgc-1α+/-:Male vs. Pgc-1α+/-:Female	*	0.046	8	10
	WT:Male vs. Pgc-1α+/-:Male	***	0.0007	6	8
	WT:Female vs. Pgc-1α+/-:Female	ns	0.0894	6	10
	Figure 3E, Gpx1 expression
	ANOVA table	SS (Type III)	DF	MS	F (DFn, DFd)	P value	P Value
	Interaction	0.2355	1	0.2355	F (1, 26) = 1.461	P=0.2377	ns
	Genotype	3.558	1	3.558	F (1, 26) = 22.08	P<0.0001	****
	Sex	0.009979	1	0.009979	F (1, 26) = 0.06191	P=0.8055	ns
	Residual	4.191	26	0.1612
	Holm-Šídák's multiple comparisons test	Summary	Adjusted P Value	N1	N2
	WT:Male vs. WT:Female	ns	0.583	6	6
	Pgc-1α+/-:Male vs. Pgc-1α+/-:Female	ns	0.583	8	10
	WT:Male vs. Pgc-1α+/-:Male	**	0.0015	6	8
	WT:Female vs. Pgc-1α+/-:Female	ns	0.0531	6	10
	Figure 3F, Esr1 expression
	ANOVA table	SS (Type III)	DF	MS	F (DFn, DFd)	P value	P Value
	Interaction	0.07021	1	0.07021	F (1, 25) = 1.011	P=0.3243	ns
	Genotype	0.7522	1	0.7522	F (1, 25) = 10.83	P=0.0030	**
	Sex	0.3272	1	0.3272	F (1, 25) = 4.712	P=0.0397	*
	Residual	1.736	25	0.06944
	Holm-Šídák's multiple comparisons test	Summary	Adjusted P Value	N1	N2
	WT:Male vs. WT:Female	ns	0.1382	6	6
	Pgc-1α+/-:Male vs. Pgc-1α+/-:Female	ns	0.3743	8	9
	WT:Male vs. Pgc-1α+/-:Male	ns	0.2306	6	8
	WT:Female vs. Pgc-1α+/-:Female	*	0.0199	6	9
	Figure 3G, Nfe2l2 expression
	ANOVA table	SS (Type III)	DF	MS	F (DFn, DFd)	P value	P Value
	Interaction	0.0001429	1	0.0001429	F (1, 26) = 0.001290	P=0.9716	ns
	Genotype	1.83	1	1.83	F (1, 26) = 16.51	P=0.0004	***
	Sex	0.2778	1	0.2778	F (1, 26) = 2.508	P=0.1254	ns
	Residual	2.881	26	0.1108
	Holm-Šídák's multiple comparisons test	Summary	Adjusted P Value	N1	N2
	WT:Male vs. WT:Female	ns	0.4208	6	6
	Pgc-1α+/-:Male vs. Pgc-1α+/-:Female	ns	0.4208	7	11
	WT:Male vs. Pgc-1α+/-:Male	*	0.0336	6	7
	WT:Female vs. Pgc-1α+/-:Female	*	0.0211	6	11
