# Supplementary material for: Sex-dependent regulation of retinal pigment epithelium and retinal function by Pgc-1α
Source: Front Cell Neurosci. 2024 Sep 2;18:1442079. doi: 10.3389/fncel.2024.1442079 (PMC11403373; doi:10.3389/fncel.2024.1442079)
Supplement: Supplementary Table 5 — ANOVA tables for Figure 4. [file Table_5.xlsx]

## Sheet: Sheet1
	Supplementary Figure 4. ANOVA Tables for Figure 4
	Figure 4A, Drp1 expression
	ANOVA table	SS (Type III)	DF	MS	F (DFn, DFd)	P value	P Value
	Interaction	0.00948	1	0.00948	F (1, 25) = 0.1602	P=0.6924	ns
	Genotype	1.336	1	1.336	F (1, 25) = 22.57	P<0.0001	****
	Sex	0.05884	1	0.05884	F (1, 25) = 0.9943	P=0.3282	ns
	Residual	1.479	25	0.05917
	Holm-Šídák's multiple comparisons test	Summary	Adjusted P Value	N1	N2
	WT:Male vs. WT:Female	ns	0.6998	6	6
	Pgc-1α+/-:Male vs. Pgc-1α+/-:Female	ns	0.4934	8	9
	WT:Male vs. Pgc-1α+/-:Male	*	0.0164	6	8
	WT:Female vs. Pgc-1α+/-:Female	**	0.0044	6	9
	Figure 4B, Mff expression
	ANOVA table	SS (Type III)	DF	MS	F (DFn, DFd)	P value	P Value
	Interaction	0.003289	1	0.003289	F (1, 26) = 0.1325	P=0.7188	ns
	Genotype	0.133	1	0.133	F (1, 26) = 5.356	P=0.0288	*
	Sex	0.01284	1	0.01284	F (1, 26) = 0.5172	P=0.4785	ns
	Residual	0.6455	26	0.02483
	Holm-Šídák's multiple comparisons test	Summary	Adjusted P Value	N1	N2
	WT:Male vs. WT:Female	ns	0.8186	6	6
	Pgc-1α+/-:Male vs. Pgc-1α+/-:Female	ns	0.6479	7	11
	WT:Male vs. Pgc-1α+/-:Male	ns	0.4848	6	7
	WT:Female vs. Pgc-1α+/-:Female	ns	0.2111	6	11
	Figure 4C, Opa1 expression
	ANOVA table	SS (Type III)	DF	MS	F (DFn, DFd)	P value	P Value
	Interaction	0.1987	1	0.1987	F (1, 25) = 5.091	P=0.0330	*
	Genotype	0.002303	1	0.002303	F (1, 25) = 0.05901	P=0.8101	ns
	Sex	0.05017	1	0.05017	F (1, 25) = 1.285	P=0.2677	ns
	Residual	0.9758	25	0.03903
	Holm-Šídák's multiple comparisons test	Summary	Adjusted P Value	N1	N2
	WT:Male vs. WT:Female	ns	0.1366	6	6
	Pgc-1α+/-:Male vs. Pgc-1α+/-:Female	ns	0.3916	8	9
	WT:Male vs. Pgc-1α+/-:Male	ns	0.254	6	8
	WT:Female vs. Pgc-1α+/-:Female	ns	0.2975	6	9
	Figure 4D, Mfn2 expression
	ANOVA table	SS (Type III)	DF	MS	F (DFn, DFd)	P value	P Value
	Interaction	0.3062	1	0.3062	F (1, 26) = 2.605	P=0.1186	ns
	Genotype	0.2631	1	0.2631	F (1, 26) = 2.238	P=0.1467	ns
	Sex	0.9608	1	0.9608	F (1, 26) = 8.175	P=0.0083	**
	Residual	3.056	26	0.1175
	Holm-Šídák's multiple comparisons test	Summary	Adjusted P Value	N1	N2
	WT:Male vs. WT:Female	ns	0.6684	6	6
	Pgc-1α+/-:Male vs. Pgc-1α+/-:Female	**	0.0071	7	11
	WT:Male vs. Pgc-1α+/-:Male	ns	0.1293	6	7
	WT:Female vs. Pgc-1α+/-:Female	ns	0.9309	6	11
	Figure 4E, Esrra expression
	ANOVA table	SS (Type III)	DF	MS	F (DFn, DFd)	P value	P Value
	Interaction	0.006722	1	0.006722	F (1, 26) = 0.1519	P=0.6999	ns
	Genotype	0.4569	1	0.4569	F (1, 26) = 10.33	P=0.0035	**
	Sex	0.006003	1	0.006003	F (1, 26) = 0.1357	P=0.7156	ns
	Residual	1.15	26	0.04424
	Holm-Šídák's multiple comparisons test	Summary	Adjusted P Value	N1	N2
	WT:Male vs. WT:Female	ns	0.989	6	6
	Pgc-1α+/-:Male vs. Pgc-1α+/-:Female	ns	0.8025	8	10
	WT:Male vs. Pgc-1α+/-:Male	ns	0.0752	6	8
	WT:Female vs. Pgc-1α+/-:Female	ns	0.1461	6	10
