# Supplementary material for: Sex-dependent regulation of retinal pigment epithelium and retinal function by Pgc-1α
Source: Front Cell Neurosci. 2024 Sep 2;18:1442079. doi: 10.3389/fncel.2024.1442079 (PMC11403373; doi:10.3389/fncel.2024.1442079)
Supplement: Supplementary Table 6 — ANOVA tables for Figure 5. [file Table_6.xlsx]

## Sheet: Sheet1
	Supplementary Figure 5. ANOVA Tables for Figure 5
	Figure 5B, Tomm20 + Drp1 Colocalization
	ANOVA table	SS (Type III)	DF	MS	F (DFn, DFd)	P value	P Value
	Interaction	0.03023	1	0.03023	F (1, 74) = 6.930	P=0.0103	*
	Genotype	0.04941	1	0.04941	F (1, 74) = 11.33	P=0.0012	**
	Sex	0.05702	1	0.05702	F (1, 74) = 13.07	P=0.0005	***
	Residual	0.3228	74	0.004363
	Holm-Šídák's multiple comparisons test	Summary	Adjusted P Value	N1	N2
	WT:Male vs. WT:Female	ns	0.7647	17	17
	Pgc-1α+/-:Male vs. Pgc-1α+/-:Female	****	<0.0001	22	22
	WT:Male vs. Pgc-1α+/-:Male	ns	0.7647	17	22
	WT:Female vs. Pgc-1α+/-:Female	***	0.0002	17	22
