# Supplementary material for: Sex-dependent regulation of retinal pigment epithelium and retinal function by Pgc-1α
Source: Front Cell Neurosci. 2024 Sep 2;18:1442079. doi: 10.3389/fncel.2024.1442079 (PMC11403373; doi:10.3389/fncel.2024.1442079)
Supplement: Supplementary Table 7 — ANOVA tables for Figure 6. [file Table_7.xlsx]

## Sheet: Sheet1
	Supplementary Figure 6. ANOVA Tables for Figure 6
	Figure 6B, Mean Aspect Ratio
	ANOVA table	SS (Type III)	DF	MS	F (DFn, DFd)	P value	P Value
	Interaction	0.0004382	1	0.0004382	F (1, 157) = 0.6636	P=0.4165	ns
	Genotype	0.000669	1	0.000669	F (1, 157) = 1.013	P=0.3157	ns
	Sex	0.005441	1	0.005441	F (1, 157) = 8.241	P=0.0047	**
	Residual	0.1037	157	0.0006603
	Holm-Šídák's multiple comparisons test	Summary	Adjusted P Value	N1	N2
	WT:Male vs. WT:Female	ns	0.4367	32	38
	Pgc-1α+/-:Male vs. Pgc-1α+/-:Female	*	0.0228	46	45
	WT:Male vs. Pgc-1α+/-:Male	ns	0.8945	32	46
	WT:Female vs. Pgc-1α+/-:Female	ns	0.4367	38	45
	Figure 6B, Mean Form Factor
	ANOVA table	SS (Type III)	DF	MS	F (DFn, DFd)	P value	P Value
	Interaction	0.003243	1	0.003243	F (1, 157) = 1.904	P=0.1696	ns
	Genotype	0.005279	1	0.005279	F (1, 157) = 3.100	P=0.0802	ns
	Sex	0.01635	1	0.01635	F (1, 157) = 9.601	P=0.0023	**
	Residual	0.2673	157	0.001703
	Holm-Šídák's multiple comparisons test	Summary	Adjusted P Value	N1	N2
	WT:Male vs. WT:Female	ns	0.4458	32	38
	WT:Male vs. Pgc-1α+/-:Male	ns	0.0908	32	46
	Pgc-1α+/-:Male vs. Pgc-1α+/-:Female	**	0.0034	46	45
	WT:Female vs. Pgc-1α+/-:Female	ns	0.7834	38	45
	Figure 6B, Mean Area
	ANOVA table	SS (Type III)	DF	MS	F (DFn, DFd)	P value	P Value
	Interaction	0.09745	1	0.09745	F (1, 157) = 12.19	P=0.0006	***
	Genotype	9.453e-06	1	9.453e-06	F (1, 157) = 0.001183	P=0.9726	ns
	Sex	0.1504	1	0.1504	F (1, 157) = 18.82	P<0.0001	****
	Residual	1.255	157	0.007993
	Holm-Šídák's multiple comparisons test	Summary	Adjusted P Value	N1	N2
	WT:Male vs. WT:Female	ns	0.5747	32	38
	Pgc-1α+/-:Male vs. Pgc-1α+/-:Female	****	<0.0001	46	45
	WT:Male vs. Pgc-1α+/-:Male	*	0.0355	32	46
	WT:Female vs. Pgc-1α+/-:Female	*	0.0348	38	45
	Figure 6B, Mean Perimeter
	ANOVA table	SS (Type III)	DF	MS	F (DFn, DFd)	P value	P Value
	Interaction	0.0382	1	0.0382	F (1, 157) = 9.084	P=0.0030	**
	Genotype	0.000879	1	0.000879	F (1, 157) = 0.2090	P=0.6482	ns
	Sex	0.06821	1	0.06821	F (1, 157) = 16.22	P<0.0001	****
	Residual	0.6603	157	0.004206
	Holm-Šídák's multiple comparisons test	Summary	Adjusted P Value	N1	N2
	WT:Male vs. WT:Female	ns	0.5021	32	38
	Pgc-1α+/-:Male vs. Pgc-1α+/-:Female	****	<0.0001	46	45
	WT:Male vs. Pgc-1α+/-:Male	ns	0.0515	32	46
	WT:Female vs. Pgc-1α+/-:Female	ns	0.1283	38	45
	Figure 6C, Branch Junctions per mito
	ANOVA table	SS (Type III)	DF	MS	F (DFn, DFd)	P value	P Value
	Interaction	0.02543	1	0.02543	F (1, 157) = 8.353	0.0044	**
	Genotype	0.002492	1	0.002492	F (1, 157) = 0.8184	0.367	ns
	Sex	0.08016	1	0.08016	F (1, 157) = 26.33	<0.0001	****
	Residual	0.4779	157	0.003044
	Holm-Šídák's multiple comparisons test	Summary	Adjusted P Value	N1	N2
	WT:Male vs. WT:Female	ns	0.2582	32	38
	Pgc-1α+/-:Male vs. Pgc-1α+/-:Female	****	<0.0001	46	45
	WT:Male vs. Pgc-1α+/-:Male	ns	0.2582	32	46
	WT:Female vs. Pgc-1α+/-:Female	*	0.0202	38	45
	Figure 6C, Branches per mito
	ANOVA table	SS (Type III)	DF	MS	F (DFn, DFd)	P value	P Value
	Interaction	0.01067	1	0.01067	F (1, 157) = 2.834	P=0.0943	ns
	Genotype	0.03348	1	0.03348	F (1, 157) = 8.894	P=0.0033	**
	Sex	0.00499	1	0.00499	F (1, 157) = 1.326	P=0.2513	ns
	Residual	0.5909	157	0.003764
	Holm-Šídák's multiple comparisons test	Summary	Adjusted P Value	N1	N2
	WT:Male vs. WT:Female	ns	0.7243	32	38
	Pgc-1α+/-:Male vs. Pgc-1α+/-:Female	ns	0.0951	46	45
	WT:Male vs. Pgc-1α+/-:Male	**	0.006	32	46
	WT:Female vs. Pgc-1α+/-:Female	ns	0.5763	38	45
	Figure 6C, Mean Branch Length per mito
	ANOVA table	SS (Type III)	DF	MS	F (DFn, DFd)	P value	P Value
	Interaction	0.06895	1	0.06895	F (1, 157) = 7.166	P=0.0082	**
	Genotype	0.01767	1	0.01767	F (1, 157) = 1.837	P=0.1773	ns
	Sex	0.1253	1	0.1253	F (1, 157) = 13.02	P=0.0004	***
	Residual	1.511	157	0.009621
	Holm-Šídák's multiple comparisons test	Summary	Adjusted P Value	N1	N2
	WT:Male vs. WT:Female	ns	0.5653	32	38
	Pgc-1α+/-:Male vs. Pgc-1α+/-:Female	****	<0.0001	46	45
	WT:Male vs. Pgc-1α+/-:Male	*	0.0176	32	46
	WT:Female vs. Pgc-1α+/-:Female	ns	0.5653	38	45
	Figure 6C, Mean Branch Length per Branch
	ANOVA table	SS (Type III)	DF	MS	F (DFn, DFd)	P value	P Value
	Interaction	0.06106	1	0.06106	F (1, 157) = 8.689	P=0.0037	**
	Genotype	0.02816	1	0.02816	F (1, 157) = 4.007	P=0.0470	*
	Sex	0.06093	1	0.06093	F (1, 157) = 8.670	P=0.0037	**
	Residual	1.103	157	0.007028
	Holm-Šídák's multiple comparisons test	Summary	Adjusted P Value	N1	N2
	WT:Male vs. WT:Female	ns	0.9983	32	38
	Pgc-1α+/-:Male vs. Pgc-1α+/-:Female	****	<0.0001	46	45
	WT:Male vs. Pgc-1α+/-:Male	ns	0.7635	32	46
	WT:Female vs. Pgc-1α+/-:Female	**	0.0014	38	45
